# Supplementary material for: Splicing variation of BMP2K balances abundance of COPII assemblies and autophagic degradation in erythroid cells
Source: eLife. 2020 Aug 14;9:e58504. doi: 10.7554/eLife.58504 (PMC7473771; doi:10.7554/eLife.58504)
Supplement: Figure 1—figure supplement 1—source data 1. [file elife-58504-fig1-figsupp1-data1.xlsx]

## Sheet: panel A
	fold mRNA levels in K562 cells
	TFRC					BMP2K-L					BMP2K-S
Biological repetition	0 h	24 h	48 h	72 h		0 h	24 h	48 h	72 h		0 h	24 h	48 h	72 h
1st	1.17442	7.67169	9.43059	10.0241		1.28777	5.13525	8.77109	9.90334		1.65038	4.09193	10.8013	14.5539
2nd	1.0007	5.69215	14.5065	8.21734		0.89509	2.36167	13.0927	14.199		0.604625	1.62248	12.7226	9.09746
3rd	0.850889	5.00033	6.61168	13.0808		0.867549	2.40973	5.29093	12.7607		1.00215	1.57326	3.21383	10.6439
Average	1.00867	6.12139	10.1829	10.4408		1.0168	3.30222	9.05158	12.2877		1.08572	2.42922	8.91259	11.4318
SEM	0.0934791	0.800462	2.30989	1.41934		0.135718	0.916622	2.25655	1.26241		0.304761	0.831474	2.90286	1.62366

## Sheet: panel C
	K562 cells
	L/S ratio
Biological repetition	gCtr#1	gCtr#2	gBMP2K#1	gBMP2K#2
1st	2.33659	2.50022	3.0822	6.16832
2nd	2.11643	2.03699	2.35494	3.49808
3rd	2.50294	2.39813	4.63064	5.36372
4th	1.61092	1.44684	2.00193	2.5755
5th	1.67742	1.65964	4.01741	3.0877
Average	2.04886	2.00836	3.21742	4.13866
SEM	0.176537	0.20391	0.4938	0.692049

## Sheet: panel D
	fold mRNA levels in K562 cells
	HBA					HBB					HBE					GYPA					TFRC					TFR2
Biological repetition	gCtr#1	gCtr#2	gBMP2K#1	gBMP2K#2		gCtr#1	gCtr#2	gBMP2K#1	gBMP2K#2		gCtr#1	gCtr#2	gBMP2K#1	gBMP2K#2		gCtr#1	gCtr#2	gBMP2K#1	gBMP2K#2		gCtr#1	gCtr#2	gBMP2K#1	gBMP2K#2		gCtr#1	gCtr#2	gBMP2K#1	gBMP2K#2
1st	0.934517	1.07007	1.52818	1.62013		0.943916	1.05942	1.45921	1.45406		0.988039	1.01211	1.24131	1.32431		0.98695	1.01322	0.720091	0.983249		0.952224	1.05017	1.78115	1.17834		0.963506	1.03788	1.25913	1.36734
2nd	1.00342	0.996596	1.20382	1.35456		1.03333	0.967749	1.22895	1.4974		0.974556	1.02611	1.07686	1.17585		0.99086	1.00922	1.0146	1.16878		0.924878	1.08122	1.25164	1.21121		1.00456	0.998542	1.12966	1.22549
3rd	1.06871	0.93571	1.3685	1.27754		1.0447	0.957216	1.86999	1.54238		1.06191	0.941699	1.06851	1.05667		0.95334	1.04894	0.869419	0.811389		1.02406	0.976503	1.23228	1.29894		1.13169	0.883631	1.12344	1.12702
Average	1.00221	1.00079	1.36683	1.41741		1.00731	0.994794	1.51939	1.49795		1.00817	0.993305	1.12889	1.18561		0.97705	1.0238	0.868038	0.987805		0.967055	1.03597	1.42169	1.2295		1.03325	0.97335	1.17074	1.23995
SEM	0.038742	0.0388437	0.0936398	0.10377		0.0318678	0.0324539	0.187482	0.0254984		0.0271516	0.0261176	0.0562603	0.077413		0.0119086	0.0126264	0.0850214	0.103194		0.0295769	0.0310536	0.179817	0.0359934		0.0506267	0.0462741	0.0442316	0.0697522

## Sheet: panel E
	% of benzidine-positive K562 cells
	basal					48 h hemin
Biological repetition	gCtr#1	gCtr#2	gBMP2K#1	gBMP2K#2		gCtr#1	gCtr#2	gBMP2K#1	gBMP2K#2
1st	0.206825	0.438596	1.8241	1.47658		4.23437	3.46101	6.88813	9.00285
2nd	0.599251	0.475543	1.52366	1.38768		4.25532	4.40165	6.90299	7.92793
3rd	0.635324	0.661521	1.82857	1.62037		6.50096	5.68384	10.0559	11.7647
4th	0.382653	0.607903	1.4997	2.37288		5.20402	5.33537	9.94075	9.39153
Average	0.456013	0.545891	1.66901	1.71438		5.04867	4.72046	8.44693	9.52176
SEM	0.100061	0.0529755	0.0909703	0.224674		0.534304	0.499505	0.896001	0.809184
