# Supplementary material for: Splicing variation of BMP2K balances abundance of COPII assemblies and autophagic degradation in erythroid cells
Source: eLife. 2020 Aug 14;9:e58504. doi: 10.7554/eLife.58504 (PMC7473771; doi:10.7554/eLife.58504)
Supplement: Figure 1—figure supplement 3—source data 1. [file elife-58504-fig1-figsupp3-data1.xlsx]

## Sheet: panel C
	continuous Tf uptake								dextran uptake
	5'				40'				40'
Biological repetition	pLKO	shCtr	shBMP2K		pLKO	shCtr	shBMP2K		pLKO	shCtr	shBMP2K
1st	34340	29588	48092		43115	46694	61283		393	396	515
2nd	32549	36165	49810		37626	41182	60619		382	388	505
3rd	45139	31369	53184		53792	38873	65978		342	345	535
4th		49281	63429			53903	68888
Average	37342.7	36600.8	53628.8		44844.3	45163	64192		372.333	376.333	518.333
SEM	3932.3	4449.05	3433.67		4746.15	3343.45	1967.88		15.4955	15.836	8.81917

## Sheet: panel E
					continuous Tf uptake										dextran uptake
					5'					40'					40'
				Biological repetition	gCtr#1	gCtr#2	gBMP2K#1	gBMP2K#2		gCtr#1	gCtr#2	gBMP2K#1	gBMP2K#2		gCtr#1	gCtr#2	gBMP2K#1	gBMP2K#2
				1st	17361	16923	20647	21533		21007	21514	24308	25903		1006	973	1099	1162
				2nd	18704	19222	20783	22364		20837	21975	24609	25887		955	933	994	1087
				3rd	20049	19732	22000	21556		23600	23346	26538	25782		1018	962	1029	1262
				4th	22946	20517	24445	28061		26402	24905	29028	32515		1112	1064	1157	1199
				Average	19765	19098.5	21968.8	23378.5		22961.5	22935	26120.8	27521.8		1022.75	983	1069.75	1177.5
				SEM	1193.89	772.524	879.669	1572.75		1309.53	763.253	1087.72	1664.63		32.7347	28.2872	36.3625	36.5525

## Sheet: panel G
	pulse chase Tf uptake
	0'				5'
Biological repetition	pLKO	shCtr	shBMP2K		pLKO	shCtr	shBMP2K
1st	11274	11862	19562		7865	8035	12220
2nd	14844	14427	23260		10176	9690	14086
3rd	14782	18146	35441		10519	13314	21749
Average	13633.3	14811.7	26087.7		9520	10346.3	16018.3
SEM	1179.8	1824.2	4796.96		833.403	1558.85	2915.53

## Sheet: panel H
	Pulse chase Tf uptake
	Tf endocytosis efficiency (%)
Biological repetition	pLKO	shCtr	shBMP2K
1st	69.7623	67.7373	62.468
2nd	68.5529	67.1657	60.5589
3rd	71.1609	73.3715	61.3668
Average	69.8254	69.4249	61.4646
SEM	0.753502	1.98023	0.553289
