# Supplementary material for: Splicing variation of BMP2K balances abundance of COPII assemblies and autophagic degradation in erythroid cells
Source: eLife. 2020 Aug 14;9:e58504. doi: 10.7554/eLife.58504 (PMC7473771; doi:10.7554/eLife.58504)
Supplement: Figure 1—source data 1. [file elife-58504-fig1-data1.xlsx]

## Sheet: panel A 
	Fold protein levels at different time-points of mouse fetal liver cell differentiation
	TFRC					BMP2K-L					BMP2K-S
Biological repetition	0h	24h	48h	72h		0h	24h	48h	72h		0h	24h	48h	72h
1st	1	5.09287	10.9536	9.83394		1	3.3125	9.08524	7.91558		1	2.82252	2.56107	1.88909
2nd	1	3.75623	5.42149	5.85134		1	2.81069	4.34075	2.01248		1	2.2951	2.33177	1.84843
3rd	1	11.6943	14.7399	16.0115		1	4.26331	4.43898	3.30304		1	3.91818	3.8668	3.23748
4th	1	6.84854	8.38765	7.55147		1	6.31827	8.26567	5.84301		1	5.65787	5.15295	3.70176
5th	1	5.66592	6.03329	6.66557		1	2.75625	4.54852	3.12981		1	2.79325	2.61682	1.82701
Average	1	6.61157	9.10718	9.18277		1	3.8922	6.13583	4.44078		1	3.49738	3.30588	2.50075
SEM	0	1.36462	1.713	1.83237		0	0.664064	1.04538	1.07122		0	0.601727	0.534075	0.402416

## Sheet: panel B
Different time-points of mouse fetal liver cell differentiation
	L/S ratio
Biological repetition	0h	24h	48h	72h
1st	0.507849	0.738012	1.40507	0.831453
2nd	0.71892	0.843721	2.55033	3.01239
3rd	0.873299	1.06949	1.6257	0.950804
4th	0.613203	0.667217	0.703941	0.625621
5th	0.448515	0.500866	0.719448	0.707954
6th	0.816838	0.806017	1.41981	1.39931
Average	0.663104	0.770887	1.40405	1.25459
SEM	0.0691795	0.0775544	0.278219	0.368626

## Sheet: panel D
FACS-isolated differentiation stages of mouse fetal liver cells
	L/S ratio
Biological repetition	R0	R1	R2	R3	R4	R5
1st	0.723549	1.36042	2.86445	3.21669	2.9233	3.01486
2nd	0.776972	1.42992	2.2769	3.10859	1.9863	2.37094
3rd	0.700718	0.93946	1.95239	2.09255	1.44694	1.74076
4th	0.794559	1.01265	3.05227	3.39333	2.96846	2.16803
5th	0.721559	0.781056	1.91864	2.09575	1.64448	1.39345
Average	0.743471	1.1047	2.41293	2.78138	2.1939	2.13761
SEM	0.0179404	0.124837	0.233189	0.284219	0.318974	0.277145

## Sheet: panel F
	K562 cells
	L/S ratio
Biological repetition	pLKO	shCtr	shBMP2K
1st	5.1294	2.73924	15.4734
2nd	1.85132	2.06873	18.2278
3rd	1.84809	1.8001	5.88352
4th	3.08464	4.2285	27.6333
5th	2.69824	2.85263	7.32927
6th	1.98209	1.67347	5.97535
Average	2.76563	2.56044	13.4204
SEM	0.51593	0.387573	3.55278

## Sheet: panel G
	fold mRNA levels in K562 cells
	HBA				HBB				HBE				GYPA				TFRC				TFR2
Biological repetition	pLKO	shCtr	shBMP2K		pLKO	shCtr	shBMP2K		pLKO	shCtr	shBMP2K		pLKO	shCtr	shBMP2K		pLKO	shCtr	shBMP2K		pLKO	shCtr	shBMP2K
1st	0.969214	1.03176	1.60557		1	1.3709	1.99341		0.989064	1.01106	2.09821		1	1.06823	3.33531		0.980326	1.02007	1.43573		0.967173	1.03394	2.00938
2nd	0.93	1.07	1.24		0.926815	1.07896	1.20177		0.95	1.06	1.44		0.983894	1.01637	2.74603		0.94	1.07	1.63		0.92	1.09	1.52
3rd	1.01	0.99	1.59		0.92	1.09	1.39		0.98	1.02	1.94		1.05	0.95	1.12		0.96	1.04	1.66		1	1	1.75
4th					0.93	1.08	2.08						0.95	1.06	1.81
Average	0.969738	1.03059	1.47852		0.944204	1.15497	1.66629		0.973021	1.03035	1.82607		0.995974	1.02365	2.25283		0.960109	1.04336	1.57524		0.962391	1.04131	1.75979
SEM	0.0230955	0.0231015	0.119346		0.0187153	0.0720202	0.217998		0.0118043	0.015047	0.198365		0.0208058	0.0270583	0.491121		0.0116412	0.0145112	0.0702912		0.0232175	0.026241	0.141356

## Sheet: panel H
	% of benzidine-positive K562 cells
	basal				2 days				3 days
Biological repetition	pLKO	shCtr	shBMP2K		pLKO	shCtr	shBMP2K		pLKO	shCtr	shBMP2K
1st	0.991135	1.31528	10.3185		6.57775	7.794	30.8199		7.81561	10.6009	29.1549
2nd	1.28524	0.964232	9.4691		7.86221	7.96862	30.0273		9	11	31.9418
3rd	0.807294	0.967247	5.84005		3.39161	4.71992	27.3941		3.81818	5.05091	17.931
Average	1.02789	1.08225	8.54256		5.94386	6.82751	29.4138		6.87793	8.88394	26.3426
SEM	0.139189	0.116518	1.37333		1.3289	1.055	1.03545		1.56762	1.91997	4.28202
