# Supplementary material for: Splicing variation of BMP2K balances abundance of COPII assemblies and autophagic degradation in erythroid cells
Source: eLife. 2020 Aug 14;9:e58504. doi: 10.7554/eLife.58504 (PMC7473771; doi:10.7554/eLife.58504)
Supplement: Figure 2—figure supplement 2—source data 1. [file elife-58504-fig2-figsupp2-data1.xlsx]

## Sheet: panel B
	Integral intensity of BMP2K fluorescence signal/cell (a.u. x 107)
	BMP2K
Biological repetition	pLKO	shCtrl	shBMP2K-L	shBMP2K-S	shBMP2K
1st	1.309	0.991325	0.55397	2.017	0.253566
2nd	1.262	0.955533	0.457674	1.36	0.168358
3rd	1.149	1.448	0.81259	2.261	1
4th	0.962606	0.88671	0.472628	1.331	0.321784
Average	1.17065	1.07039	0.574215	1.74225	0.435927
SEM	0.0770478	0.127727	0.0822264	0.234491	0.190625

## Sheet: panel C
	EGFP mean pixel intensity as fold change over mean intensity in the remaining cell area
	PM region				juxtanuclear region
	EGFP	EGFP-BMP2K-L	EGFP-BMP2K-S		EGFP	EGFP-BMP2K-L	EGFP-BMP2K-S
SEC16A co-staining	0.93444	1.91528	1.50237		1.18416	1.4549	3.16386
SEC24B co-staining	0.943207	2.01635	1.52067		1.21564	1.44989	3.31683
