# Supplementary material for: Splicing variation of BMP2K balances abundance of COPII assemblies and autophagic degradation in erythroid cells
Source: eLife. 2020 Aug 14;9:e58504. doi: 10.7554/eLife.58504 (PMC7473771; doi:10.7554/eLife.58504)
Supplement: Figure 2—source data 1. [file elife-58504-fig2-data1.xlsx]

## Sheet: panel B
	Western blotting band intensity (a.u. x 106)
	BMP2K-S			BMP2K-L
Biological repetition	IP EGFP	IP EGFP-SEC16A		IP EGFP	IP EGFP-SEC16A
1st	2.76722	15.5345		0.315566	1.1298
2nd	4.4372	11.4575		0.533635	2.47005
3rd	2.10344	16.7331		0.853878	4.18567
Average	3.10262	14.575		0.567693	2.59517
SEM	0.694257	1.5967		0.156328	0.884371
