# Supplementary material for: Splicing variation of BMP2K balances abundance of COPII assemblies and autophagic degradation in erythroid cells
Source: eLife. 2020 Aug 14;9:e58504. doi: 10.7554/eLife.58504 (PMC7473771; doi:10.7554/eLife.58504)
Supplement: Figure 3—figure supplement 1—source data 1. [file elife-58504-fig3-figsupp1-data1.xlsx]

## Sheet: A
	Fold protein levels in K562 cells
	SEC16A
Biological repetition	pLKO	shCtr	shBMP2K-L	shBMP2K-L#2	shBMP2K-S	shBMP2K-S#2
1st	1	0.840036	1.31593	1.70545	0.0590928	0.532341
2nd	1	1.26459	1.54109	1.73279	0.335676	0.80493
3rd	1	1.22714	1.63241	2.63449	0.240782	0.636242
Average	1	1.11059	1.49648	2.02425	0.21185	0.657838
SEM	0	0.135708	0.0940428	0.305225	0.0811426	0.0794271

## Sheet: B
	Integral fluorescence of SEC16A-positive vesicular structures/cell (a.u. x 105)
	juxtanuclear						dispersed
Biological repetition	pLKO	shCtrl	shBMP2K-L	shBMP2K-S	shBMP2K		pLKO	shCtrl	shBMP2K-L	shBMP2K-S	shBMP2K
1st	3.81	4.76	4.05	1.42	1.03		2.27	2.25	3.71	3.19	1.86
2nd	2.31	3.02	2.91	1.38	1.5		0.8	0.93	1.25	2.34	0.73
3rd	2.67	2.31	2.72	1.5	1.16		0.87	0.6	2.18	3.72	0.93
4th	1.53	1.63	1.27	0.64	0.84		0.48	0.49	0.54	1.02	0.54
5th	2.61	3.27	2.23	0.97	1.23		0.75	0.73	1.77	1.76	0.77
Average	2.586	2.998	2.636	1.182	1.152		1.034	1	1.89	2.406	0.966
SEM	0.367227	0.525542	0.453449	0.163658	0.109426		0.315984	0.320967	0.531178	0.483938	0.231961

## Sheet: D
	Integral fluorescence of SEC24B-positive vesicular structures/cell (a.u. x 105)
	juxtanuclear						dispersed
Biological repetition	pLKO	shCtrl	shBMP2K-L	shBMP2K-S	shBMP2K		pLKO	shCtrl	shBMP2K-L	shBMP2K-S	shBMP2K
1st	1.23	1.21	0.9	0.66	0.65		1.69	1.48	1.53	2.06	1.37
2nd	1.25	1.26	0.7	0.95	0.58		1.42	1.32	1.4	2.06	1.27
3rd	0.75	1	0.65	0.8	0.63		1.12	1.19	1.52	1.8	1.6
4th	1.07	1.08	0.59	0.63	0.47		1.1	0.98	1.19	1.62	1.14
Average	1.075	1.1375	0.71	0.76	0.5825		1.3325	1.2425	1.41	1.885	1.345
SEM	0.115578	0.0594944	0.0672062	0.0733712	0.0402854		0.139844	0.105702	0.0790569	0.10751	0.0971682

## Sheet: E
	Mean fluorescence intensity of SEC31A/SEC24B-positive vesicular structure (a.u. x 105)
	juxtanuclear						dispersed
Biological repetition	pLKO	shCtrl	shBMP2K-L	shBMP2K-S	shBMP2K		pLKO	shCtrl	shBMP2K-L	shBMP2K-S	shBMP2K
1st	1.23	1.21	0.9	0.66	0.65		1.69	1.48	1.53	2.06	1.37
2nd	1.25	1.26	0.7	0.95	0.58		1.42	1.32	1.4	2.06	1.27
3rd	0.75	1	0.65	0.8	0.63		1.12	1.19	1.52	1.8	1.6
4th	1.07	1.08	0.59	0.63	0.47		1.1	0.98	1.19	1.62	1.14
Average	1.075	1.1375	0.71	0.76	0.5825		1.3325	1.2425	1.41	1.885	1.345
SEM	0.115578	0.0594944	0.0672062	0.0733712	0.0402854		0.139844	0.105702	0.0790569	0.10751	0.0971682
