# Supplementary material for: Splicing variation of BMP2K balances abundance of COPII assemblies and autophagic degradation in erythroid cells
Source: eLife. 2020 Aug 14;9:e58504. doi: 10.7554/eLife.58504 (PMC7473771; doi:10.7554/eLife.58504)
Supplement: Figure 3—source data 1. [file elife-58504-fig3-data1.xlsx]

## Sheet: Fig. 3A
	Fold protein levels in K562 cells
	SEC16A						SEC24B
Biological repetition	pLKO	shCtr	shBMP2K-L	shBMP2K-S	shBMP2K		pLKO	shCtr	shBMP2K-L	shBMP2K-S	shBMP2K
1st	1	1.06	1.28	0.03	0.09		1	0.97233	0.959067	0.739317	1.10643
2nd	1	1.37	1.51	0.23	0.28		1	1.0948	0.933978	1.04133	1.13892
3rd	1	0.84	1.38	0.29	0.63		1	1.11274	0.779232	0.632334	0.846934
4th	1	0.78	1.1	0.13	0.15		1	0.811059	0.824905	0.565879	0.570496
5th	1	0.975498	1.6363	0.142383	0.260529		1	1.02632	1.44171	0.961902	0.984921
Average	1	1.0051	1.38126	0.164477	0.282106		1	1.00345	0.987779	0.788153	0.929539
SEM	0	0.103675	0.0924606	0.0446151	0.0937702		0	0.0542196	0.118278	0.0922926	0.103424

## Sheet: Fig. 3B
	fold mRNA levels in K562 cells
	SEC16A
Biological repetition	pLKO	shCtr	shBMP2K-L	shBMP2K-S	shBMP2K
1st	1	1.15786	1.36315	0.99754	0.884923
2nd	1	1.08102	1.21569	1.03817	0.738907
3rd	1	1.08102	1.21569	1.03817	0.738907
4th	1	1.10247	1.06857	1.73462	0.926237
5th	1	1.03576	1.00342	1.09926	0.713523
Average	1	1.09163	1.17331	1.18155	0.800499
SEM	0	0.0198132	0.063035	0.139217	0.0436403

## Sheet: Fig. 3D
	Number of SEC31A-positive vesicular structures/cell
	juxtanuclear						dispersed
Biological repetition	pLKO	shCtrl	shBMP2K-L	shBMP2K-S	shBMP2K		pLKO	shCtrl	shBMP2K-L	shBMP2K-S	shBMP2K
1st	4.05	3.79	2.45	2.89	2.82		50.16	44.54	46.89	45.1	45.91
2nd	3.66	3.64	2.1	3.28	3.05		47.9	47.39	43.4	48.71	47.99
3rd	4.37	3.79	2.24	3.01	2.92		48.55	45.42	43.77	42.08	46.36
4th	3.53	3.53	1.89	2.77	2.47		42.74	39.66	39.8	44.78	48.37
5th	3.26	3.35	1.64	2.5	2.44		39.59	37.95	38.25	39.84	42.04
Average	3.774	3.62	2.064	2.89	2.74		45.788	42.992	42.422	44.102	46.134
SEM	0.195974	0.0834266	0.139879	0.129035	0.122025		1.98632	1.79106	1.53325	1.49904	1.12487

## Sheet: Fig. 3E
	Mean fluorescence intensity of SEC31A/structure (a.u. x 105)
	juxtanuclear						dispersed
Biological repetition	pLKO	shCtrl	shBMP2K-L	shBMP2K-S	shBMP2K		pLKO	shCtrl	shBMP2K-L	shBMP2K-S	shBMP2K
1st	1.24691	1.14776	0.812245	1.95502	1.34043		0.259769	0.237539	0.257624	0.604435	0.342845
2nd	0.715847	0.739011	0.557143	1.25	0.829508		0.2238	0.224942	0.218664	0.4186	0.27214
3rd	0.977117	0.868074	0.665179	1.74751	0.982877		0.247992	0.232056	0.253827	0.562738	0.331104
4th	1.06799	1.12748	0.724868	1.787	1.29555		0.263687	0.274584	0.265327	0.561411	0.357453
5th	0.91411	1.02687	0.737805	2.072	1.15164		0.258651	0.256917	0.268758	0.661898	0.353235
Average	0.984395	0.981837	0.699448	1.76231	1.12		0.25078	0.245208	0.25284	0.561816	0.331355
SEM	0.0874686	0.0783183	0.0425827	0.140772	0.0958107		0.00722855	0.00906242	0.00894754	0.0402148	0.0154893
