# Supplementary material for: Splicing variation of BMP2K balances abundance of COPII assemblies and autophagic degradation in erythroid cells
Source: eLife. 2020 Aug 14;9:e58504. doi: 10.7554/eLife.58504 (PMC7473771; doi:10.7554/eLife.58504)
Supplement: Figure 4—source data 1. [file elife-58504-fig4-data1.xlsx]

## Sheet: panel A
	Fold protein levels in K562 cells
	LC3B-II						p62
Biological repetition	pLKO	shCtr	shBMP2K-L	shBMP2K-S	shBMP2K		pLKO	shCtr	shBMP2K-L	shBMP2K-S	shBMP2K
1st	1	1.05	0.41	2.75	2.32		1	1.26	2.79	1.14	1.4
2nd	1	0.95	0.38	3.33	1.31		1	0.91	2.85	1.4	1.5
3rd	1	1.07	0.6	4.82	1.67		1	0.9	2.76	1.43	1.06
4th	1	0.95	0.66	1.6	1.12		1	0.99	1.82	1.11	1.95
Average	1	1.005	0.5125	3.125	1.605		1	1.015	2.555	1.27	1.4775
SEM	0	0.0320156	0.0692068	0.669658	0.264213		0	0.084113	0.245713	0.0841625	0.183502

## Sheet: panel B
	fold mRNA levels in K562 cells
	p62
Biological repetition	pLKO	shCtr	shBMP2K-L	shBMP2K-S	shBMP2K
1st	1	0.602218	1.06978	2.68115	1.38454
2nd	1	1.07205	2.05433	4.69557	1.62239
3rd	1	0.924819	1.41689	2.62878	1.96306
4th	1	1.09227	1.25758	2.72159	1.36857
5th	1	1.03443	1.12373	2.79126	1.76843
Average	1	0.945158	1.38446	3.10367	1.6214
SEM	0	0.0904806	0.177888	0.398859	0.113661

## Sheet: panel C
	Fold change of protein levels upon BafA1 vs basal levels
	p62
	pLKO	shCtr	shBMP2K-L	shBMP2K-S	shBMP2K
	2.11327	2.05006	1.28621	3.30399	2.69834

## Sheet: panel D
	% of benzidine-positive K562 cells
	basal					hemin 48 h
Biological repetition	pLKO	shCtr	shBMP2K-L	shBMP2K-S		pLKO	shCtr	shBMP2K-L	shBMP2K-S
1st	0.539309	0.477414	0.210394	5.45609		4.76619	6.03732	3.23887	6.01295
2nd	0.402643	0.965256	0.272376	2.89899			5.19187	1.2987	5.77465
3rd	0.37155	0.439422	0.254065	2.5		6.99126	6.87023	3.30317	7.63942
4th	0.725615	0.635696	0.351584	2.08926		11.1645	11.0422	8.42993	8.30217
5th	0.747508	0.632911	0.355872	2.06825		14.1234	16.7482	8.85073	8.09399
Average	0.557325	0.63014	0.288858	3.00252		9.26132	9.17796	5.02428	7.16464
SEM	0.078503	0.0927469	0.028341	0.632066		2.09406	2.14315	1.52102	0.53111

## Sheet: panel E
	fold mRNA levels in K562 cells
	HBA					HBB					GYPA					ANK1					TFRC
Biological repetition	pLKO	shCtr	shBMP2K-L	shBMP2K-S		pLKO	shCtr	shBMP2K-L	shBMP2K-S		pLKO	shCtr	shBMP2K-L	shBMP2K-S		pLKO	shCtr	shBMP2K-L	shBMP2K-S		pLKO	shCtr	shBMP2K-L	shBMP2K-S
1st	1	1.14	1.43	1.24		1	1.46	0.4	2.17		1	1.13	1.31	2.77		1	0.99	1.09	2.48		1	1.24	1.1	1.39
2nd	1	1.12	0.94	0.85		1	1.4	0.51	2.77		1	1.1	1.45	2.87		1	0.905483	0.847296	1.39823		1	1.03	1.01	1.08
3rd	1	1.33	1.63	1.24		1	1.69	0.78	3.69		1	1.04	1.09	2.34		1	0.94	0.89	1.86		1	1.13	2.24	2.58
4th	1	1.16	1.95	1.13		1	0.41	0.98	1.92		1	1.07	1.85	3.36		1	0.99	0.96	1.97		1	1.2	1.18	1.49
5th	1	1.29	1.25	1.08		1	1.25	0.53	3.07		1	1	0.88	2.45		1	0.92	0.69	1.65		1	1.22	1.22	1.57
Average	1	1.208	1.44	1.108		1	1.242	0.64	2.724		1	1.068	1.316	2.758		1	0.949097	0.895459	1.87165		1	1.164	1.35	1.622
SEM	0	0.0425911	0.170646	0.0716519		0	0.219713	0.105309	0.316885		0	0.0226716	0.164973	0.179538		0	0.0175751	0.0657931	0.180715		0	0.0382884	0.225389	0.253523
